# Supplementary material for: A Leafhopper-Transmissible DNA Virus with Novel Evolutionary Lineage in the Family Geminiviridae Implicated in Grapevine Redleaf Disease by Next-Generation Sequencing
Source: PLOS journal article supplement (doi:10.1371/journal.pone.0064194), 2013-06-05
Supplement: S4 (10.1371/journal.pone.0064194.s004) [file journal.pone.0064194.s004]

**Table S1a. Classification of sequence reads.** Classification and abundance of high-throughput sequence reads obtained from ribo-depleted and dual-depleted cDNA libraries derived from symptomatic and non-symptomatic grapevine leaves, when mapped to virus/viroid database.

| Category of sequence reads                 | Reads from ribo-depleted cDNA library |             | Reads from dual-depleted cDNA library |             |
|--------------------------------------------|---------------------------------------|-------------|---------------------------------------|-------------|
|                                            | Symptoms                              | No Symptoms | Symptoms                              | No Symptoms |
| <b>Total reads</b>                         | 34,504,862                            | 76,668,556  | 1,865,157                             | 3,345,220   |
| <b>Total hits to virus/viroid database</b> | 53,988                                | 16,268      | 3,232                                 | 2,539       |
| <b>Unmapped reads</b>                      | 34,465,910                            | 76,652,288  | 1,862,331                             | 3,342,861   |

**Table S1b. Sequence reads summary for host subtraction and assembly approach.**

| Category of sequence reads                                        | Reads from ribo-depleted cDNA library |             | Reads from double depleted cDNA library |             |
|-------------------------------------------------------------------|---------------------------------------|-------------|-----------------------------------------|-------------|
|                                                                   | Symptoms                              | No Symptoms | Symptoms                                | No Symptoms |
| <b>Total reads</b>                                                | 34,504,862                            | 76,668,556  | 1,865,157                               | 3,345,220   |
| <b>Reads mapped to <i>Vitis</i> genome</b>                        | 11,938,839                            | 34,459,395  | 597,216                                 | 1,350,283   |
| <b>Reads not mapped to <i>Vitis</i> genome (used in assembly)</b> | 22,566,023                            | 42,209,161  | 1,267,941                               | 1,994,937   |
| <b># of Scaffolds assembled from non-<i>Vitis</i> reads</b>       | 20,066                                |             | 436                                     |             |
